# Supplementary material for: Quaternized styryl-azinium fluorophores as cellular RNA-binders
Source: Royal Society of Chemistry journal article supplement (doi:10.1039/c9pp00465c), 2020-02-26
Supplement: c9pp00465c1.pdf [file c9pp00465c1.pdf]

## Supplementary Information

### Interaction with salmon testes DNA

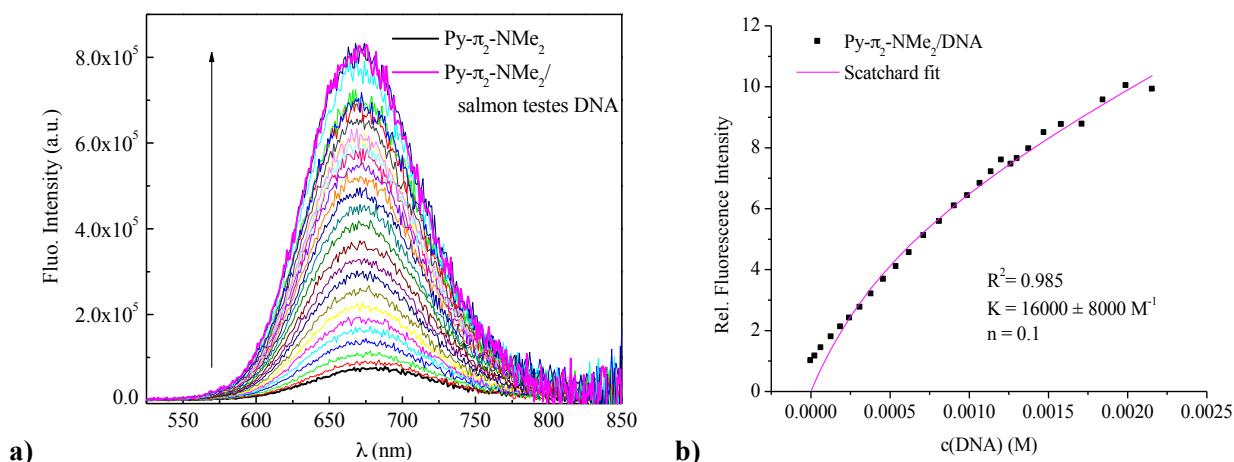

**Figure S1. a)** Changes in the fluorescence spectrum of  $\text{Py-}\pi_2\text{-NMe}_2$  ( $\lambda_{\text{exc}} = 470 \text{ nm}$ ,  $c = 3.9 \cdot 10^{-6} \text{ M}$ ), upon titration with salmon testes DNA; **b)** Dependence of the fluorescence intensity of  $\text{Py-}\pi_2\text{-NMe}_2$  on  $c(\text{DNA})$ ; in ETN buffered solution (pH = 7.4).

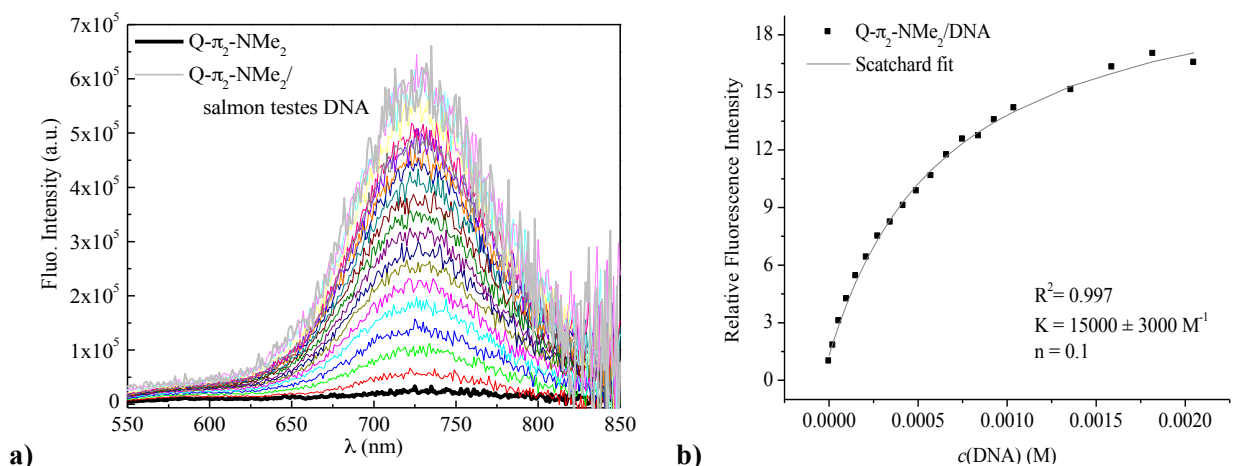

**Figure S2. a)** Changes in the fluorescence spectrum of  $\text{Q-}\pi_2\text{-NMe}_2$  ( $\lambda_{\text{exc}} = 515 \text{ nm}$ ,  $c = 2.5 \cdot 10^{-6} \text{ M}$ ), upon titration with salmon testes DNA; **b)** Dependence of the relative intensity of  $\text{Q-}\pi_2\text{-NMe}_2$  on  $c(\text{DNA})$ ; in ETN buffered solution (pH = 7.4).

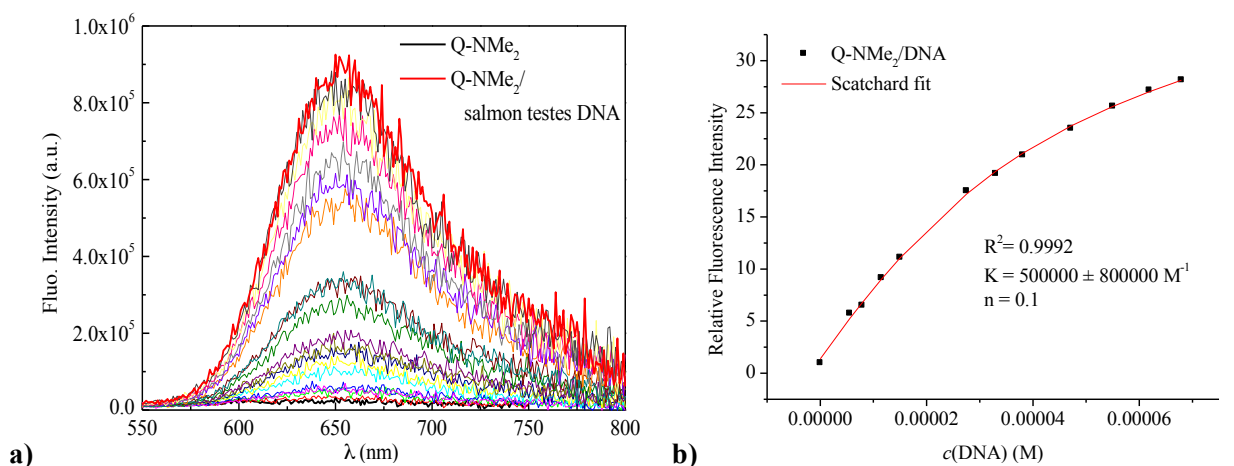

**Figure S3. a)** Changes in the fluorescence spectrum of  $\text{Q-NMe}_2$  ( $\lambda_{\text{exc}} = 498 \text{ nm}$ ,  $c = 3.3 \cdot 10^{-6} \text{ M}$ ), upon titration with salmon testes DNA; **b)** Dependence of the relative fluorescence intensity of  $\text{Q-NMe}_2$  on  $c(\text{DNA})$ ; in ETN buffered solution (pH = 7.4).
